# Supplementary material
Source: MDPI journal article supplement (https://www.mdpi.com/2075-163X/11/12/1432)
Supplement: s1 [file s1]

## Supplementary Information

# Beneficiation of Low-Grade Rare Earth Ore from Khalzan Burgetei Deposit (Mongolia) by Magnetic Separation

Ihwan Park <sup>1,\*</sup>, Yuki Kanazawa <sup>2</sup>, Naoya Sato <sup>2</sup>, Purevdelger Galtchandmani <sup>2</sup>, Manis Kumar Jha <sup>3</sup>, Carlito Baltazar Tabelin <sup>4</sup>, Sanghee Jeon <sup>1</sup>, Mayumi Ito <sup>1</sup> and Naoki Hiroyoshi <sup>1</sup>

## 1. SEM-EDS analysis of thin-sections of ore sample

Figure S1 shows the SEM-EDS analysis of REE ore thin-section. Apart from bastnaesite and pyrochlore, synchysite ( $\text{Ca}(\text{REE})(\text{CO}_3)_2\text{F}$ ) and columbite-(Fe) were also found to be REE-bearing minerals (Figure S1). Zircon has been reported to incorporate REEs into its structure [19,26,27], but REE signals were not detected on zircon (Figure S1). The grain sizes of REE-carbonates (e.g. bastnaesite and synchysite) and pyrochlore varied from 10 to 154  $\mu\text{m}$  and 10 to 243  $\mu\text{m}$ , respectively (Figures 4 and S1).

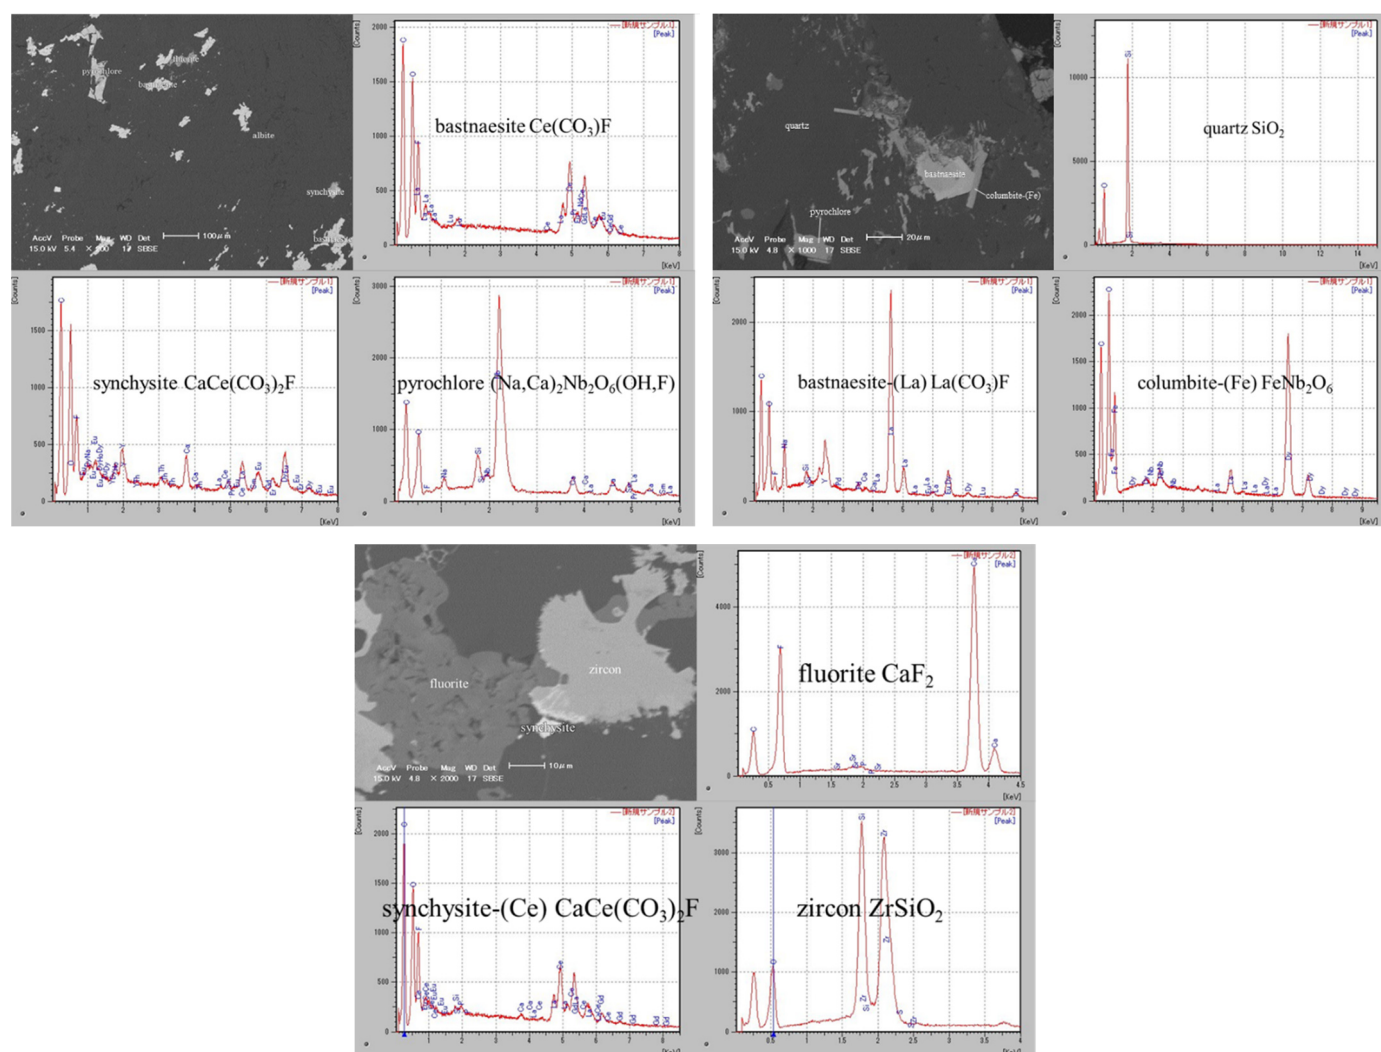

**Figure S1.** Back-scattered electron (BSE) images and EDS point analyses of REE ore thin-section.
